# Supplementary material for: Nanohybrid membranes with hydroxide ion transport highways constructed from imidazolium-functionalized graphene oxide
Source: Royal Society of Chemistry journal article supplement (doi:10.1039/c5ra18183f), 2015-01-01
Supplement: c5ra18183f1.pdf [file c5ra18183f1.pdf]

**Electronic Supplementary Material (ESI) for RSC Advances.**

**This journal is © The Royal Society of Chemistry 2015**

## **Supporting Information**

### **Nanohybrid membranes with hydroxide ion transport highways constructed from imidazolium-functionalized graphene oxide**

Huiling Chen,<sup>a</sup> Jianshe Wang,<sup>a</sup> Huijuan Bai,<sup>a</sup> Jie Sun,<sup>b</sup> Yifan Li,<sup>a</sup> Yong Liu,<sup>a</sup> Jingtao Wang<sup>\*a</sup>,

<sup>a</sup>School of Chemical Engineering and Energy, Zhengzhou University, Zhengzhou 450001, P. R.

China

<sup>b</sup>Lab of Renewable energy and energy safety, Institute of NBC Defense, Beijing 102205, P. R.

China

\*To whom correspondence should be addressed. E-mail: [jingtaowang@zzu.edu.cn](mailto:jingtaowang@zzu.edu.cn).

**Fig. S1.** XRD patterns of CS control and nanohybrid membranes.

**Fig. S2.** (a) TGA curves of CS/C<sub>10</sub>-ImGO-X under a nitrogen atmosphere, and (b) stress-strain curves of CS/C<sub>4</sub>-ImGO-X.

**Fig. S3.** (a) Temperature-dependent conductivity of (a) CS/GO-X, (b) CS/C<sub>4</sub>-ImGO-X, (c) CS/C<sub>10</sub>-ImGO-X, and (d) CS/B-ImGO-X under 100% RH.

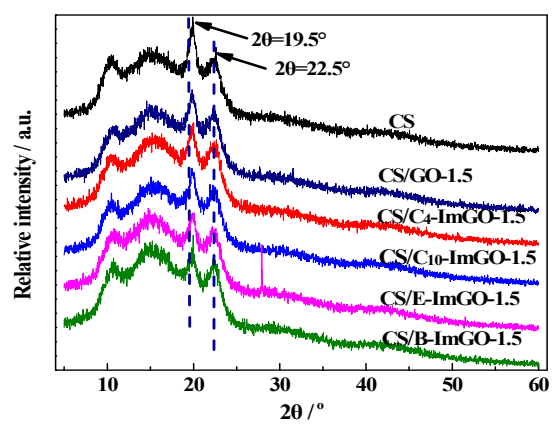

Fig. S1. XRD patterns of CS control and nanohybrid membranes.

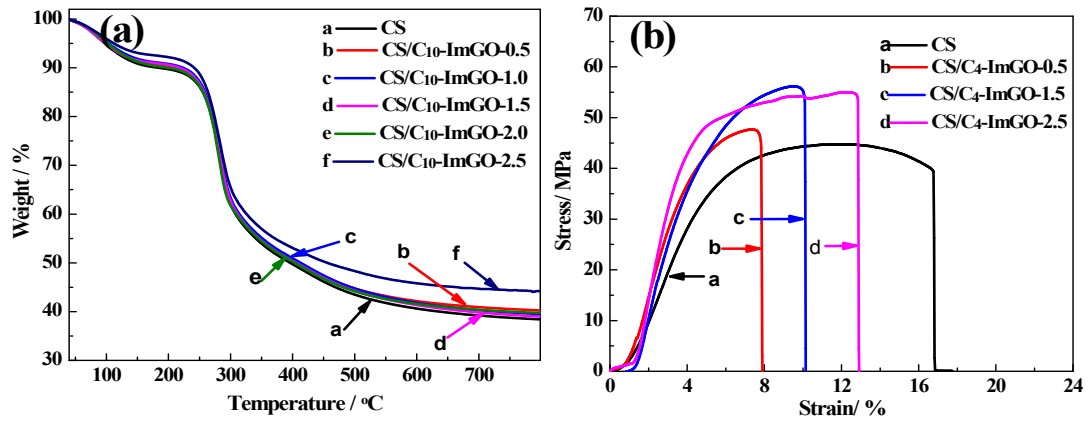

Fig. S2. (a) TGA curves of CS/C<sub>10</sub>-ImGO-X under a nitrogen atmosphere, and (b) stress-strain curves of CS/C<sub>4</sub>-ImGO-X.

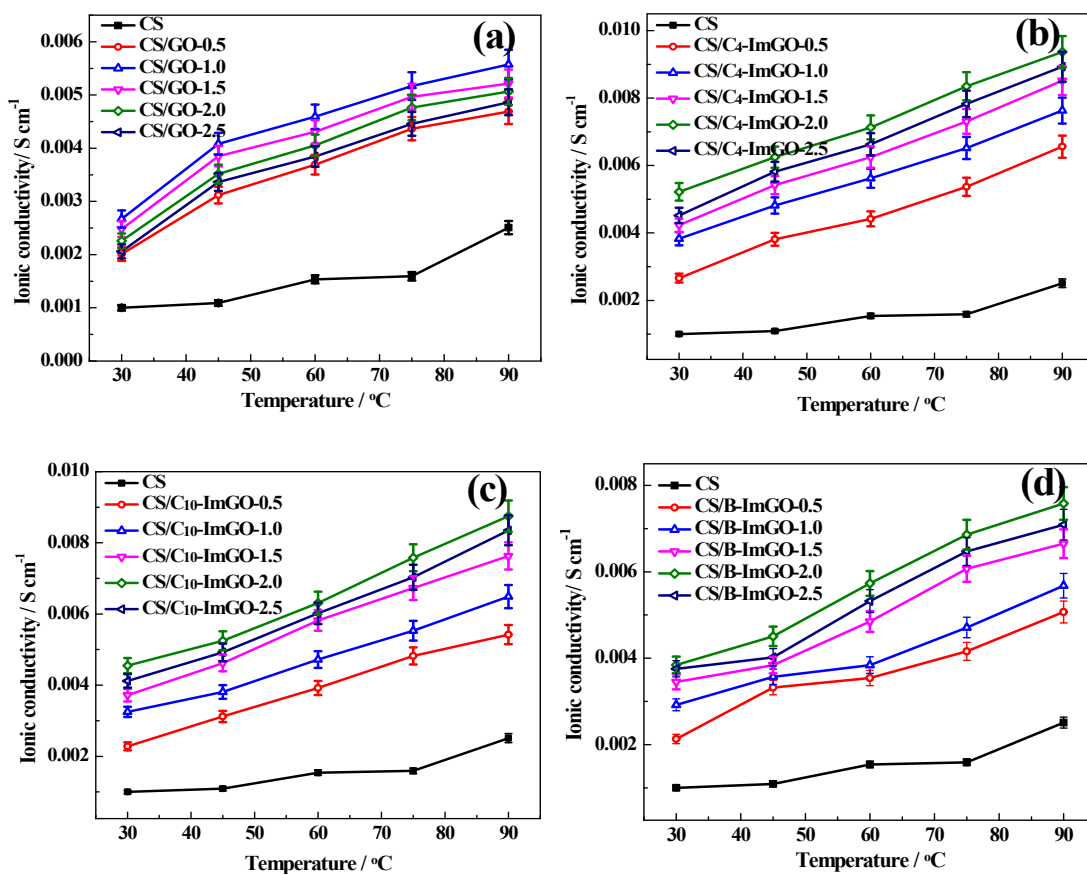

**Fig. S3.** (a) Temperature-dependent conductivity of (a) CS/GO-X, (b) CS/C<sub>4</sub>-ImGO-X, (c) CS/C<sub>10</sub>-ImGO-X, and (d) CS/B-ImGO-X under 100% RH.
